# Supplementary material for: Growth Differentiation Factor‐15 Predicts Mortality and Heart Failure Exacerbation But Not Ventricular Arrhythmias in Patients With Cardiomyopathy
Source: PubMed Central journal article supplement — J Am Heart Assoc. 2023 Jan 31;12(3):e8023. doi: 10.1161/JAHA.122.026003 (PMC9973637; doi:10.1161/jaha.122.026003), 2023-01-31

# **SUPPLEMENTAL MATERIAL**

| Group    | AF        |                        | no AF     |                        | unadj pval | adj pval |
|----------|-----------|------------------------|-----------|------------------------|------------|----------|
|          | N samples | GDF-15 Median (25, 75) | N samples | GDF-15 Median (25, 75) |            |          |
| CHF      | 26        | 2004 (1352, 5014)      | 133       | 1378 (944, 1859)       | 0.0012     | 0.0233   |
| VT/VF    | 36        | 1476 (823, 2950)       | 144       | 1031 (737, 1682)       | 0.0059     | 0.06     |
| Controls | 69        | 1681 (989, 2984)       | 274       | 984 (733, 1513)        | <.0001     | 0.14     |

**Table S1. Comparison of GDF-15 values for patients with AF versus no AF.** Statistically significant increases were seen for the AF group, regardless of subgroup. Adjusted p-values were adjusted for age at implantation, sex, race, hsCRP, and IL-6 in the HF cohorts, and age at implantation, sex, race, and hsCRP levels in the VT/VF cohorts.

| Group    | Ischemic Cardiomyopathy | GDF-15 Median (25, 75) | Nonischemic Cardiomyopathy | GDF-15 Median (25, 75) | Unadjusted p-value | Adjusted p-value |
|----------|-------------------------|------------------------|----------------------------|------------------------|--------------------|------------------|
|          | N samples               |                        | N samples                  |                        |                    |                  |
| CHF      | 62                      | 1504 (1195, 2250)      | 97                         | 1313 (893, 2213)       | 0.09               | 0.63             |
| VT/VF    | 89                      | 1463 (908, 1990)       | 91                         | 866 (672, 1392)        | <.0001             | 0.61             |
| Controls | 193                     | 1164 (850, 1990)       | 150                        | 894 (644, 1421)        | <.0001             | 0.37             |

**Table S2. Ischemic and Nonischemic Cardiomyopathy relationship to GDF-15 values.** Adjusted p-values are adjusted for age at implantation, sex, race, hsCRP and IL-6.

| <b>Biomarker</b> | <b>Spearman R</b> | <b>P-value</b> |
|------------------|-------------------|----------------|
| hsIL-6           | 0.38794           | <.0001         |
| hsCRP            | 0.2389            | 0.0042         |
| IL-10            | 0.16573           | 0.0487         |
| TNF-a            | 0.46464           | <.0001         |
| Pro-BNP          | 0.36634           | <.0001         |

**Table S3. Biomarker correlations with GDF-15 values using the first available GDF-15 measurement.**

| <b>Parameter</b>                   | <b>Hazard Ratio</b> | <b>95% Confidence Interval</b> | <b>P-value</b> |
|------------------------------------|---------------------|--------------------------------|----------------|
| Age at device implantation (years) | 1.02                | 0.999 - 1.04                   | 0.06           |
| Male sex                           | 1.42                | 0.82 - 2.43                    | 0.21           |
| White race                         | 0.63                | 0.38 - 1.04                    | 0.07           |
| Ischemic cardiomyopathy            | 0.88                | 0.51 - 1.50                    | 0.63           |
| Statin use                         | 0.92                | 0.52 - 1.62                    | 0.77           |
| Aspirin use                        | 1.79                | 1.05 - 3.06                    | 0.0325         |
| (log) GDF-15 (pg/ml)               | 3.17                | 2.33 - 4.30                    | <.0001         |

**Table S4. Original statistical model with GDF-15 utilized.**

| <b>Parameter</b>                   | <b>Hazard Ratio</b> | <b>95% Wald Confidence Limits</b> | <b>P value</b> |
|------------------------------------|---------------------|-----------------------------------|----------------|
| Age at device implantation (years) | 1.022               | 1-1.043                           | 0.0484         |
| Male sex                           | 1.559               | 0.885-2.745                       | 0.12           |
| White race                         | 0.639               | 0.373-1.094                       | 0.10           |
| Ischemic cardiomyopathy            | 0.792               | 0.451-1.391                       | 0.42           |
| Statin use                         | 1.199               | 0.646-2.226                       | 0.57           |
| Aspirin use                        | 1.721               | 0.989-2.996                       | 0.05           |
| (log) GDF-15 (pg/ml)               | 2.951               | 2.083-4.181                       | <.0001         |
| <b>(log) IL-6</b>                  | 1.262               | 0.983-1.62                        | 0.07           |

**Table S5. Statistical model from S4, with IL-6 added.**

| <b>Parameter</b>                   | <b>Hazard Ratio</b> | <b>95% Wald Confidence Limits</b> | <b>P value</b> |
|------------------------------------|---------------------|-----------------------------------|----------------|
| Age at device implantation (years) | 1.022               | 1.001-1.044                       | 0.0419         |
| Male sex                           | 1.566               | 0.893-2.747                       | 0.12           |
| White race                         | 0.609               | 0.357-1.037                       | 0.07           |
| Ischemic cardiomyopathy            | 0.861               | 0.489-1.513                       | 0.60           |
| Statin use                         | 1.16                | 0.631-2.133                       | 0.63           |
| Aspirin use                        | 1.672               | 0.96-2.914                        | 0.07           |
| (log) GDF-15 (pg/ml)               | 3.19                | 2.306-4.412                       | <.0001         |
| <b>(log) hsCRP</b>                 | 1.222               | 1.005-1.485                       | 0.0444         |

**Table S6. Statistical model from S4, with hsCRP added.**

| <b>Parameter</b>                   | <b>Hazard Ratio</b> | <b>95% Wald Confidence Limits</b> | <b>P value</b> |
|------------------------------------|---------------------|-----------------------------------|----------------|
| Age at device implantation (years) | 1.021               | 0.999-1.043                       | 0.06           |
| Male sex                           | 1.5                 | 0.851-2.644                       | 0.16           |
| White race                         | 0.589               | 0.349-0.996                       | 0.0481         |
| Ischemic cardiomyopathy            | 0.803               | 0.463-1.393                       | 0.44           |
| Statin use                         | 1.075               | 0.592-1.951                       | 0.81           |
| Aspirin use                        | 1.707               | 0.979-2.976                       | 0.06           |
| (log) GDF-15 (pg/ml)               | 3.484               | 2.538-4.784                       | <.0001         |
| <b>(log) IL-10</b>                 | 1.077               | 0.895-1.296                       | 0.43           |

**Table S7. Statistical model from S4, with IL-10 added.**

| <b>Parameter</b>                   | <b>Hazard Ratio</b> | <b>95% Wald Confidence Limits</b> | <b>P value</b> |
|------------------------------------|---------------------|-----------------------------------|----------------|
| Age at device implantation (years) | 1.02                | 0.999-1.042                       | 0.06           |
| Male sex                           | 1.617               | 0.903-2.897                       | 0.11           |
| White race                         | 0.579               | 0.342-0.979                       | 0.0415         |
| Ischemic cardiomyopathy            | 0.823               | 0.474-1.428                       | 0.49           |
| Statin use                         | 1.028               | 0.569-1.859                       | 0.93           |
| Aspirin use                        | 1.72                | 0.992-2.983                       | 0.05           |
| (log) GDF-15 (pg/ml)               | 3.371               | 2.452-4.635                       | <.0001         |
| <b>(log) TNF-alpha</b>             | 1.306               | 0.788-2.165                       | 0.30           |

**Table S8** Statistical model from S4, with TNF-alpha added. Note, potential collinearity identified between GDF-15 and TNF-alpha)

| <b>Parameter</b>                   | <b>Hazard Ratio</b> | <b>95% Wald Confidence Limits</b> | <b>P value</b> |
|------------------------------------|---------------------|-----------------------------------|----------------|
| Age at device implantation (years) | 1.021               | 0.999-1.043                       | 0.06           |
| Male sex                           | 1.437               | 0.817-2.527                       | 0.21           |
| White race                         | 0.579               | 0.341-0.982                       | 0.0427         |
| Ischemic cardiomyopathy            | 0.802               | 0.457-1.405                       | 0.44           |
| Statin use                         | 1.082               | 0.593-1.974                       | 0.80           |
| Aspirin use                        | 1.673               | 0.961-2.914                       | 0.07           |
| (log) GDF-15 (pg/ml)               | 3.162               | 2.267-4.41                        | <.0001         |
| <b>(log) ProBNP</b>                | 1.233               | 0.827-1.838                       | 0.30           |

**Table S9.** Statistical model from S4, with ProBNP added.

Figure S1. Retrospective cohort study illustration, showing total patient and sample numbers, along with 90-day subgroups.

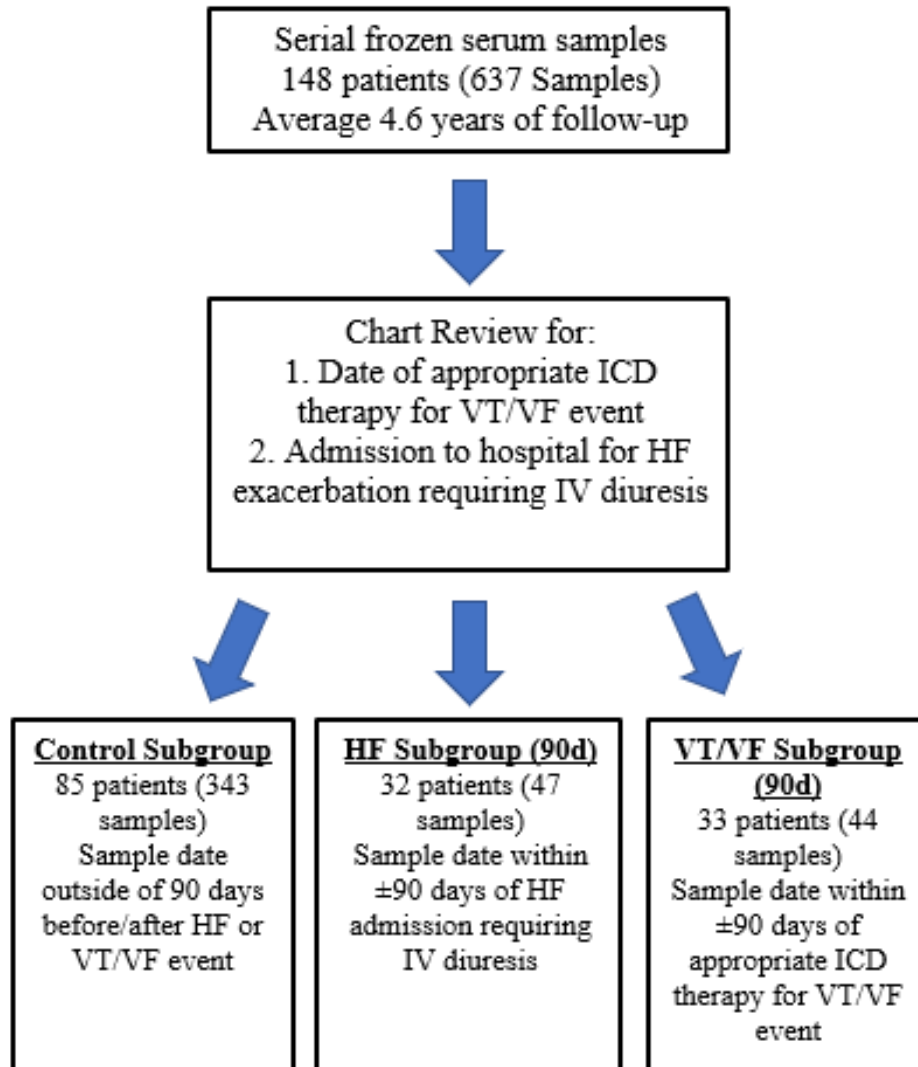

Supplement: JAH3-12-00e8023-s001.pdf [file JAH3-12-00e8023-s001.pdf]
